# Supplementary material
Source: PubMed Central journal article supplement (PMC2825399)
Supplement: supp_M109.082990_Supplemental_Material.pdf [file supp_M109.082990_Supplemental_Material.pdf]

## Supplemental Material, M109.082990

### *Plasmids and site-directed mutagenesis –*

mVDAC1 (obtained from W.J. Craigen, University of Houston) was cloned into plasmid pEGFP-N1 (Clontech) for construction of mVDAC1-GFP or pcDNA4/TO for constructing tetracycline regulated expression. Plasmid pEGFP-N1, carrying the wild type mVDAC1 gene, served as the template for amplification of mutant mVDAC1 genes. Site-directed mutagenesis of mVDAC1 was carried out *in vitro* by overlapping PCR amplification using the following primers: for E65Q, 5'-TGGACTCAGTATGGGCTGACG-3' (forward) and GCCCATACTGAGTCCATCTG (reverse), for E72Q, GACGTTTACACAGAAAGTGGAAAC (forward) and GTTCCACTTCTGTGTAAACGTC (reverse), For E202Q, GAAGTTGCAGACTGCTGTCAATCTC (forward) and GCGAGATTGACAGCAGTCTGCAAC (reverse), where the exchanged nucleotide is in bold.

Native or mutated mVDAC1 coding sequences were cloned into the *Bam*H1 and *Eco*RV restriction sites of the pcDNA4/TO vector (Invitrogen) containing the zeocin resistance gene and two tetracycline operator sites within the human cytomegalovirus (CMV) immediate-early promoter to allow for tetracycline-regulated expression of mVDAC1 in transfected cells.

Plasmid pEGFP-Bcl2 was obtained from R.J. Youle (NIH) (NIH). DNA encoding Bcl2 $\alpha$  (obtained from E. Gross, Weizmann Institute of Science) was cloned into the *Nco*I and *Eco*RI restriction sites of the pHisparallel vector for construction of plasmid Bcl2( $\Delta$ 23) using following primers: (forward) CACCATGGCGCACG CTGGGAGAACG and (reverse) CGGAATTCTTACAGAGACAGCCAGGAGAAATC.
